# Supplementary material for: Removal of Total Nitrogen and Phosphorus Using Single or Combinations of Aquatic Plants
Source: PubMed Central journal article supplement (PMC6926882; doi:10.3390/ijerph16234663), 2019-11-22
Supplement: ijerph-16-04663-s001.pdf [file ijerph-16-04663-s001.pdf]

## Supplementary data

### Removal of total nitrogen and phosphorus using single or combinations of aquatic plants

Feng Su <sup>1,4</sup>, Zhian Li <sup>1,3</sup>, Yingwen Li <sup>1</sup>, Lei Xu <sup>1,4</sup>, Shiyu Li <sup>1,4</sup>, Yongxing Li <sup>1</sup>, Hongfeng Chen <sup>1,2</sup>, Ping Zhuang <sup>1,3,\*</sup>, and Faguo Wang <sup>1,2,\*</sup>

South China Botanical Garden, Chinese Academy of Sciences, Guangzhou 510650, PR China

<sup>2</sup> Key Laboratory of Plant Resources Conservation and Sustainable Utilization, Guangdong Provincial Key Laboratory of Applied Botany, South China Botanical Garden, Chinese Academy of Sciences, Guangzhou 510650, PR China

<sup>3</sup> Southern Marine Science and Engineering Guangdong Laboratory (Guangzhou), Guangzhou 511458, PR China

<sup>4</sup> University of Chinese Academy of Sciences, Beijing 100049, PR China

\* Correspondence: zhuangp@scbg.ac.cn (Z.P.), Tel.: +86-20-37252905, Fax: +86-20-37252905; wangfg@scbg.ac.cn (F.W.)

**Table S1. Biomass production of aquatic plants in the screening experiments grow for 36 days (n=3)**

|                                         | Initial biomass<br>(day 1) | Final<br>biomass<br>(day 36) | Mean net increase<br>(g/tank) | Relative<br>biomass<br>increase |
|-----------------------------------------|----------------------------|------------------------------|-------------------------------|---------------------------------|
| <i>Colocasia tonnoimo</i>               | 203±10.34                  | 163±10.05                    | -42.08                        | -20.4%                          |
| <i>Dysophylla sampsonii</i>             | 102±0.14                   | 32.0±4.38                    | -69.51                        | -68.5%                          |
| <i>Eichhornia crassipes</i>             | 177±6.89                   | 230±37.33                    | 52.74                         | 46.0%                           |
| <i>Eleocharis<br/>plantagineiformis</i> | 259±68.00                  | 230±2.67                     | -29.00                        | -13.0%                          |
| <i>Hydrocotyle vulgaris</i>             | 238±27.17                  | 385±20.13                    | 146.7                         | 64.1%                           |
| <i>Ipomoea aquatica</i>                 | 150±0.36                   | 156±4.24                     | 5.73                          | 3.8%                            |
| <i>Rotala indica</i>                    | 149±0.93                   | 163±2.12                     | 13.82                         | 9.2%                            |
| <i>Salvinia natans</i>                  | 100±0.06                   | 214±7.18                     | 113.87                        | 114.0%                          |
| <i>Typha orientalis</i>                 | 466±0.29                   | 377±15.68                    | -88.50                        | -19.0%                          |

**Table S2. Plant biomass development during treatment (g/tank, n=3, fresh weight)**

| Plants                                                                        | Artificial domestic wastewater |        |        |        |       |          | Artificial animal farm wastewater |        |        |        |       |          |
|-------------------------------------------------------------------------------|--------------------------------|--------|--------|--------|-------|----------|-----------------------------------|--------|--------|--------|-------|----------|
|                                                                               | Initial                        | Day 11 | Day 36 | Day 48 | Total | Increase | Initial                           | Day 11 | Day 36 | Day 48 | Total | Increase |
| <i>E. plantagineiformis</i>                                                   | 74.8                           | 11.7   | 0.00   | 94.0   | 106   | 41.4%    | 67.2                              | 10.2   | 0.00   | 52.4   | 62.5  | -6.91%   |
| <i>Hydrocotyle vulgaris</i>                                                   | 67.1                           | 4.7    | 5.50   | 46.6   | 56.8  | -15.3%   | 71.1                              | 3.21   | 30.5   | 26.2   | 59.9  | -15.7%   |
| <i>Ipomoea aquatica</i>                                                       | 46.3                           | 36.2   | 25.4   | 22.0   | 83.5  | 80.5%    | 48.1                              | 22.4   | 7.96   | 21.8   | 52.1  | 8.44%    |
| <i>Salvinia natans</i>                                                        | 39.8                           | 66.1   | 45.5   | 22.1   | 133.7 | 235%     | 39.7                              | 27.6   | 36.2   | 25.5   | 89.3  | 125%     |
| <i>Salvinia natans</i><br>+ <i>E. plantagineiformis</i>                       | 107                            | 78.8   | 38.0   | 56.6   | 173   | 62.8%    | 120                               | 9.68   | 13.6   | 92.0   | 115   | -4.20%   |
| <i>Hydrocotyle vulgaris</i><br>+ <i>E.plantagineiformis</i>                   | 147                            | 13.9   | 0.00   | 79.9   | 93.7  | -36.3%   | 149                               | 18.1   | 0.00   | 86.3   | 104   | -25.1%   |
| <i>Ipomoea aquatica</i><br>+ <i>E.plantagineiformis</i>                       | 127                            | 47.4   | 15.2   | 71.2   | 134   | 5.14%    | 128                               | 20.8   | 14.7   | 13.9   | 149   | 16.4%    |
| <i>Salvinia natans</i><br>+ <i>E.plantagineiformis</i><br>+ <i>H.vulgaris</i> | 87.8                           | 24.1   | 19.0   | 75.4   | 118   | 34.9%    | 87.4                              | 8.33   | 18.9   | 97.8   | 125   | 27.9%    |

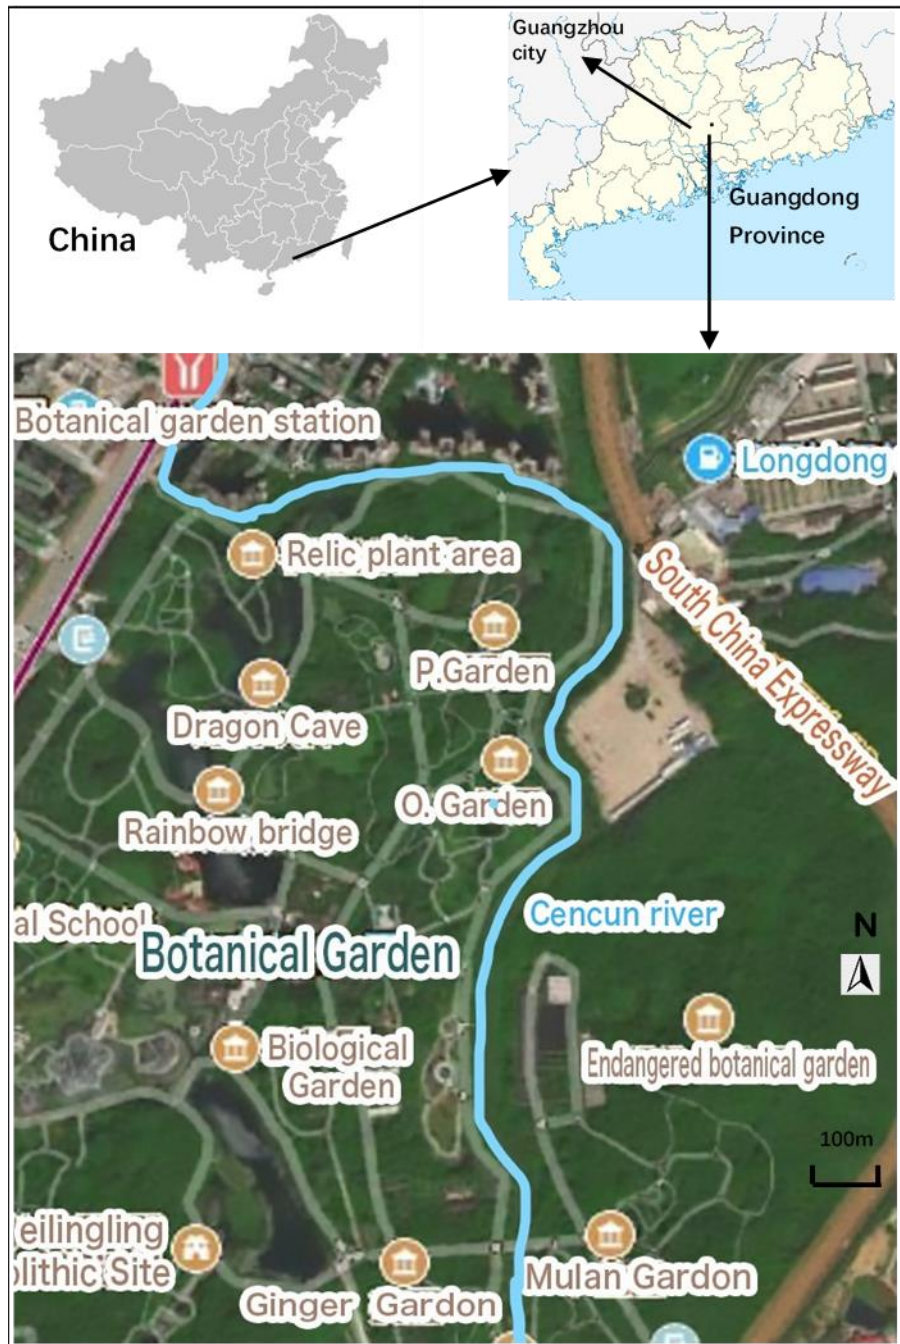

**Figure 1.** Locations of the drainage ditch (Cencun River) flowing through the South China Botanical Garden, Guangzhou, China.

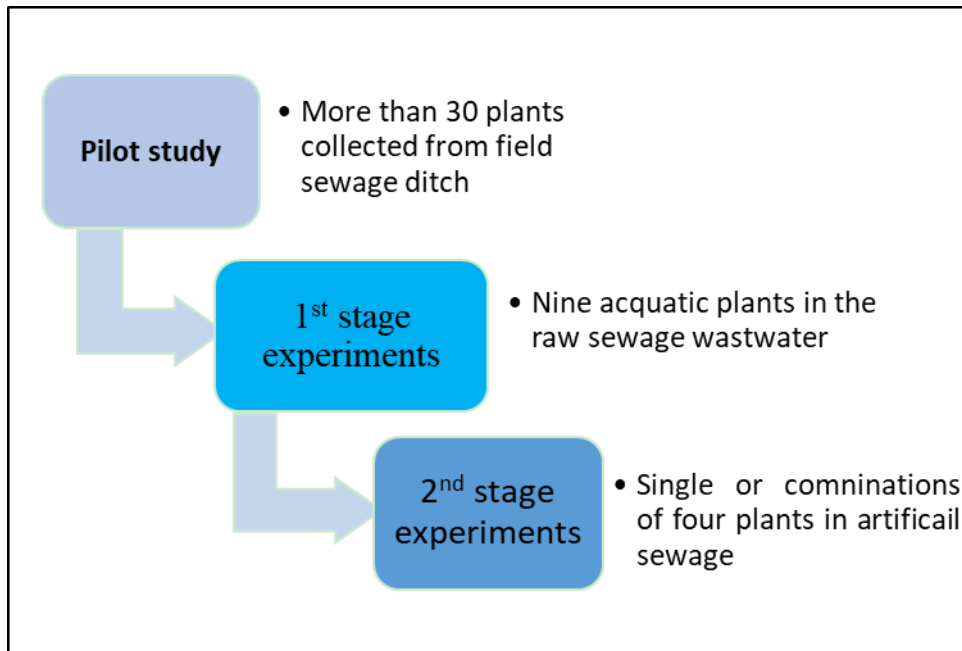

**Figure S2.** The flowchart of this study.
